# Supplementary material for: The Quest for Anti-α-Synuclein Antibody Specificity—Lessons Learnt From Flow Cytometry Analysis
Source: Frontiers journal article supplement (doi:10.3389/fneur.2022.869103), 2022-07-15
Supplement: Data_Sheet_2.PDF [file Data_Sheet_2.PDF]

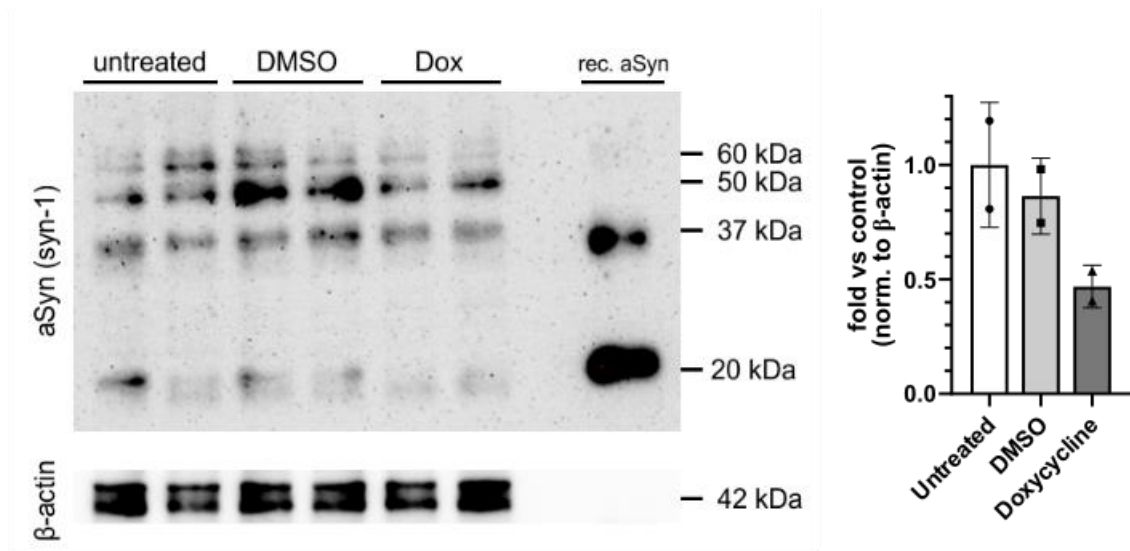

**Supplementary Figure 3. Monomeric and aggregated aSyn blocks the LB509 antibody binding with similar efficiency.** Detection of aSyn protein levels in untreated and treated with DMSO or doxycycline (Dox) H4 cell overexpressing aSyn under the tet-off system with the syn-1 anti-aSyn antibody by Western blot. Left: WB membrane probed with the syn-1 antibody. Two replicates per sample were loaded. Recombinant aSyn (rec. aSyn) was loaded as a positive control for aSyn protein detection. Bands just below 20 kDa protein marker correspond to aSyn monomers. β-Actin was used as a loading control. Right: Quantification of the WB results revealed marked downregulation of aSyn protein level in Doxycycline-treated aSyn overexpressing H4 cells compared to DMSO-treated or untreated ones. The aSyn monomer band intensity was normalised to β-actin in each sample followed by the normalization to the DMSO-treated sample.
